# Supplementary material for: Mechanical birth-related trauma to the neonate: An imaging perspective
Source: PubMed Central journal article supplement (PMC5825313; doi:10.1007/s13244-017-0586-x), 2018-01-22

# Classification of Birth-Related Trauma Based on Affected Organ System

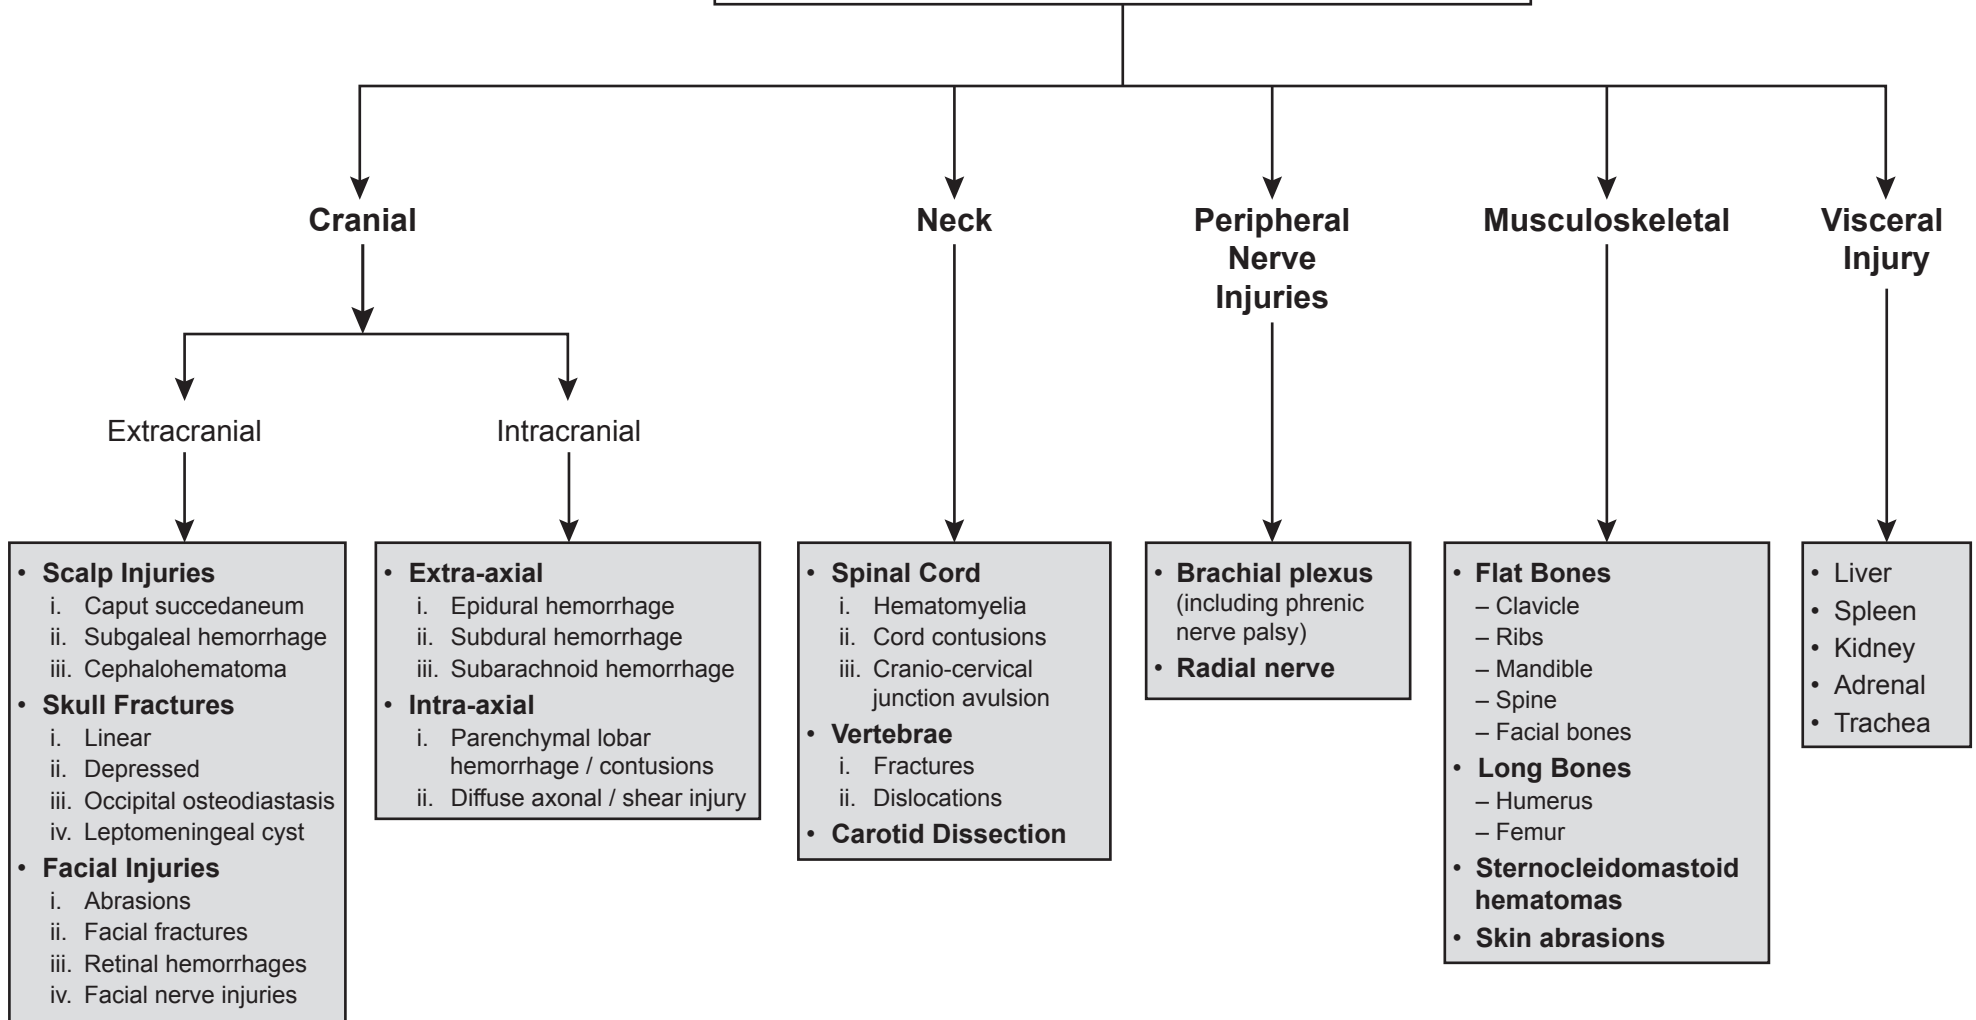

Supplement: 13244_2017_586_MOESM1_ESM.pdf [file 13244_2017_586_MOESM1_ESM.pdf]
