# Supplementary material for: Mechanical birth-related trauma to the neonate: An imaging perspective
Source: PubMed Central journal article supplement (PMC5825313; doi:10.1007/s13244-017-0586-x), 2018-01-22
Supplement: 13244_2017_586_MOESM2_ESM.pdf [file 13244_2017_586_MOESM2_ESM.pdf]

## Birth-related Extracranial (Skull/Scalp) Injuries in the Newborn

| Type of Extracranial Traumatic Lesion | Location                                                       | Clinical Presentation                                                                                                                                                   | Complications                                                                        | Treatment Required                                                                                                      |
|---------------------------------------|----------------------------------------------------------------|-------------------------------------------------------------------------------------------------------------------------------------------------------------------------|--------------------------------------------------------------------------------------|-------------------------------------------------------------------------------------------------------------------------|
| Caput Sucedaneum                      | Subcutaneous, no periosteal involvement, crosses skull sutures | Boggy scalp Edema, "chignon" appearance of scalp                                                                                                                        | None, resolves spontaneously                                                         | None                                                                                                                    |
| Subgaleal Hemorrhage                  | Subaponeurotic                                                 | 90% cases associated with vacuum extraction, fluctuant, firm scalp mass, can spread downward to the eye                                                                 | Can lead to serious blood loss                                                       | Usually none required. Blood transfusion in cases of hemorrhagic shock; epicranial aspiration with compression dressing |
| Cephalohematoma                       | Subperiosteal hemorrhage, confined by skull sutures            | Tense, firm, painful scalp mass; can enlarge over the first few days; can be mistaken for depressed skull fracture on palpation, may be associated with skull fractures | Usually resolve spontaneously in few weeks, infected cephalohematomas extremely rare | Usually none, rarely aspiration                                                                                         |
