# Supplementary material for: Mechanical birth-related trauma to the neonate: An imaging perspective
Source: PubMed Central journal article supplement (PMC5825313; doi:10.1007/s13244-017-0586-x), 2018-01-22
Supplement: 13244_2017_586_MOESM3_ESM.pdf [file 13244_2017_586_MOESM3_ESM.pdf]

## Birth-related Skull Fractures in the Neonate

| Pattern of Skull Injury                  | Clinical & Imaging Features                                                                                                                                                                                                                                                                                                             |
|------------------------------------------|-----------------------------------------------------------------------------------------------------------------------------------------------------------------------------------------------------------------------------------------------------------------------------------------------------------------------------------------|
| Linear Fracture                          | <ul style="list-style-type: none"> <li>• Commonly involve parietal bone.</li> <li>• Asymptomatic and heal spontaneously.</li> <li>• May be associated with cephalohematomas, epi-and subdural hematomas, dural tears and cerebral contusions.</li> <li>• CT with 3D reformats diagnostic.</li> <li>• No treatment necessary.</li> </ul> |
| Depressed Fracture                       | <ul style="list-style-type: none"> <li>• May present as “ping-pong” fractures due to softness of calvarium.</li> <li>• May be associated with intra-and extra cranial hematomas.</li> <li>• CT with 3D reformats diagnostic</li> <li>• May spontaneously elevate; surgical management sometimes required.</li> </ul>                    |
| Occipital Osteodiastasis                 | <ul style="list-style-type: none"> <li>• Usually occurs with breech birth.</li> <li>• Disrupted synchondrosis between squamous and occipital portions of occipital bone.</li> <li>• Associated posterior fossa hemorrhages</li> <li>• CT with 3D reformats/ MR for posterior fossa imaging</li> </ul>                                   |
| Leptomeningeal Cyst/<br>Growing Fracture | <ul style="list-style-type: none"> <li>• Enlarging fracture due to leptomeningeal entrapment at fracture site</li> <li>• Resorption of fracture margins secondary to CSF pulsations</li> <li>• CT with 3 D reformats diagnostic</li> </ul>                                                                                              |
