# Supplementary material for: Mechanical birth-related trauma to the neonate: An imaging perspective
Source: PubMed Central journal article supplement (PMC5825313; doi:10.1007/s13244-017-0586-x), 2018-01-22
Supplement: 13244_2017_586_MOESM4_ESM.pdf [file 13244_2017_586_MOESM4_ESM.pdf]

## Birth-related Traumatic Intracranial Injuries

| Type of Traumatic Hemorrhage | Location                                                                                                                                   | Clinical Presentation/Diagnosis                                                                                                                                                                                      | Accompanying injuries                                                                                        | Course/Complications                                                            | Treatment                                                                   |
|------------------------------|--------------------------------------------------------------------------------------------------------------------------------------------|----------------------------------------------------------------------------------------------------------------------------------------------------------------------------------------------------------------------|--------------------------------------------------------------------------------------------------------------|---------------------------------------------------------------------------------|-----------------------------------------------------------------------------|
| <b>Epidural Hemorrhage</b>   | Between dura and periosteum                                                                                                                | If large, can present with bulging fontanel or suture separation; history of difficult delivery with instrumentation, CT diagnostic                                                                                  | Linear skull fracture                                                                                        | Usually small; if large, can present with bulging fontanel or suture separation | Usually observation is sufficient, occasionally evacuation may be necessary |
| <b>Subdural Hemorrhage</b>   | Into the subdural space, typically at parieto-occipital convexity, suboccipital or interhemispheric. May passively extend infratentorially | If small, irritability; moderate-sized may present with signs of raised intracranial pressure and episodic staring; if large, nuchal rigidity, dilated pupils, respiratory failure and cardiac arrest. CT diagnostic | Cerebral contusions                                                                                          | Usually uncomplicated; no compression of infratentorial structures              | Usually observation is sufficient                                           |
| <b>Subarachnoid</b>          | Into the subarachnoid space                                                                                                                | Seizures, hypotonia, irritability, somnolence, focal neurological symptoms                                                                                                                                           | Intraparenchymal hemorrhage/ other extracranial hemorrhages                                                  | Usually uncomplicated, occasionally result in adhesions                         | None necessary                                                              |
| <b>Cerebellar Contusion</b>  | Cerebellar parenchyma                                                                                                                      |                                                                                                                                                                                                                      | Occipital osteodiastasis                                                                                     |                                                                                 | Serial lumbar punctures; furosemide/ acetazolamide administration           |
| <b>Cerebral Contusion</b>    | Cerebral parenchyma                                                                                                                        | Seizures                                                                                                                                                                                                             | Extracranial hemorrhages, skull fractures (occasionally occur in context of an existing AVM or coagulopathy) | Cysts and porencephalic cavities can form-spastic diplegia may result           | No specific therapy                                                         |
| <b>Ischemic Stroke</b>       | Internal carotid artery vascular territory                                                                                                 | Horner's syndrome, cranial nerve palsies, seizures, hemiparesis                                                                                                                                                      | Skull fractures                                                                                              | Varies according to distribution/ manifestation of injury                       | Varies according to distribution/ manifestation of injury                   |
